# Supplementary material for: Feasibility evaluation of the treatment and recycling of shale gas produced water: a case study of the first shale gas field in the Eastern Sichuan Basin, China
Source: Royal Society of Chemistry journal article supplement (doi:10.1039/c8ew00760h), 2018-12-11
Supplement: c8ew00760h1.pdf [file c8ew00760h1.pdf]

**Feasibility evaluation of the treatment and recycling of shale gas  
produced water: A case study of the first shale gas field in the Eastern  
Sichuan Basin, China**

Zhaoji Zhang, <sup>\* a</sup>, Yiling Zhuang, <sup>a, b</sup>, Junjie Li, <sup>a, b</sup>, Zejun Zhou <sup>c</sup> and Shaohua Chen <sup>\* a</sup>

<sup>a</sup> *Key Laboratory of Urban Pollutant Conversion, Institute of Urban Environment, Chinese Academy of Sciences,  
Xiamen 361021, People's Republic of China*

<sup>b</sup> *University of Chinese Academy of Sciences, Beijing 100049, People's Republic of China*

<sup>c</sup> *Sinopec Chongqing Fuling Shale Gas Exploration & Development Co.Ltd., Chongqing 408014, China.*

*E-mail: zjzhang@iue.ac.cn, shchen@iue.ac.cn*

Supporting data: 12 pages, 5 tables, 6 figures.

**Table S1** Operational strategy and parameters for the laboratory-scale PW treatment

| Step | Treatment process                                     |                                        | Parameters                                                                                                                         |
|------|-------------------------------------------------------|----------------------------------------|------------------------------------------------------------------------------------------------------------------------------------|
| 1    | Pretreatment and combined advanced chemical oxidation | Coagulation                            | Dosing $\text{Al}_2(\text{SO}_4)_3$ with pH = 6.0                                                                                  |
| 2    |                                                       | Modified Fenton oxidation <sup>a</sup> | $\text{H}_2\text{O}_2 = 10 \text{ mL/L}$ ; $\text{FeSO}_4 \cdot 7\text{H}_2\text{O} = 0.5 \text{ and } 2.5 \text{ g/L}$ ; pH = 3.2 |
| 3    |                                                       | NaClO oxidation                        | NaClO = 1 mL/L; pH = 7.0                                                                                                           |
| 4    |                                                       | Residual chlorine removal              | $\text{Na}_2\text{SO}_3$ dosing                                                                                                    |
| 5    | Multi-media filtration                                | Sand-artificial zeolite filtration     | -                                                                                                                                  |
| 6    |                                                       | Activated carbon filtration            | -                                                                                                                                  |
| 7    | Desalination                                          | RO                                     | RO membrane material:GE1812; Pressure = 3.0–4.0 MPa; Pure water conductivity = 450–650 $\mu\text{S/cm}$                            |

a. Modified Fenton oxidation was designed by dosing  $\text{FeSO}_4 \cdot 7\text{H}_2\text{O}$  twice in an entire Fenton oxidation experiment.

**Table S2** Operational strategy and parameters for recycling RO concentrate

| Step | Treatment process               |                                                         | Parameters                                                          |
|------|---------------------------------|---------------------------------------------------------|---------------------------------------------------------------------|
| 1    | Pretreatment                    | Coagulation-softening                                   | -                                                                   |
| 2    |                                 | NaClO oxidation                                         | NaClO = 21 mL/L; pH = 10.0–11.0                                     |
| 3    | Advanced oxidation <sup>a</sup> | O <sub>3</sub> -H <sub>2</sub> O <sub>2</sub> oxidation | O <sub>3</sub> gas flow rate = 30 L/h;<br>pH = 11.0                 |
| 4    |                                 | Electrochemical oxidation                               | DSA-type anode; Stainless steel cathode; Current = 0.77 A; pH = 7.5 |
| 5    | Advanced filtration             | Ion exchange                                            | D-301 anion exchange resin;<br>Filtration flow rate = 1.0 L/h       |
| 6    |                                 | Activated carbon filtration                             | Granular activated carbon;<br>Filtration flow rate = 1.0 L/h        |
| 7    | Concentration                   | Evaporation concentration                               | -                                                                   |

a. Removal efficiencies of residual refractory organic matters in the pretreated RO concentrate by O<sub>3</sub>-H<sub>2</sub>O<sub>2</sub> oxidation and DSA-type electrochemical oxidation techniques were compared.

**Table S3** Operational strategy and parameters of MBBR system for the co-treatment of PW with domestic wastewater

| Reactor volume (L) | Sequencing batch operational mode                                                                         | HRT (h) | DO in Oxidic stage (mg/L) | MLSS concentration | Biofilm carriers                      |
|--------------------|-----------------------------------------------------------------------------------------------------------|---------|---------------------------|--------------------|---------------------------------------|
| 8.0                | Feeding (0.25 h)/Anoxic (2 h)/Oxidic (2 h)/Anoxic (2 h)/Oxidic (1 h)/Setting (0.5 h)/Withdrawing (0.25 h) | 8.0     | 4.5–6.5                   | 3000–4000 mg/L     | AnoxKaldnes K5 type; Fill ratio = 30% |

**Table S4** Representative of identified molecules in the PW from the Eastern Sichuan Basin by TD-GC-MS analysis

| Formula                                                       | Compound name                           | CAS         |
|---------------------------------------------------------------|-----------------------------------------|-------------|
| C <sub>7</sub> H <sub>5</sub> N <sub>5</sub> O <sub>3</sub>   | Pterin-6-carboxylic acid                | 948-60-7    |
| C <sub>9</sub> H <sub>11</sub> F <sub>2</sub> NO <sub>3</sub> | Benzeneethanamine                       | 152434-78-1 |
| C <sub>2</sub> H <sub>6</sub> N <sub>2</sub> O <sub>2</sub>   | Hydroxyacetic acid                      | 3530-14-1   |
| C <sub>10</sub> H <sub>18</sub> O <sub>2</sub>                | 8-Methyl-6-nonenic acid                 | 21382-25-2  |
| C <sub>21</sub> H <sub>34</sub> S <sub>2</sub>                | cyclic ethylene mercaptole              | 2759-86-6   |
| C <sub>14</sub> H <sub>25</sub> F <sub>3</sub> O <sub>2</sub> | 2-Trifluoroacetoxydodecane              | 1894-68-4   |
| C <sub>8</sub> H <sub>24</sub> O <sub>4</sub> Si <sub>4</sub> | Cyclotetrasiloxane                      | 556-67-2    |
| C <sub>22</sub> H <sub>45</sub> Cl <sub>3</sub> Si            | Docosyltrichlorosilane                  | 7325-84-0   |
| C <sub>13</sub> H <sub>28</sub>                               | 5-ethyl-5-methyldecane                  | 17312-74-2  |
| C <sub>31</sub> H <sub>56</sub>                               | Pentacosan-13-ylbenzene                 | 6006-90-2   |
| C <sub>11</sub> H <sub>21</sub> ClO                           | 4-Chloro-3-n-hexyltetrahydropyran       | 66555-66-6  |
| C <sub>12</sub> H <sub>24</sub> O                             | Z-2-Dodecenol                           | 69064-36-4  |
| C <sub>10</sub> H <sub>9</sub> NO <sub>2</sub>                | 4-Methoxy-2(1H)-quinolone               | 27667-34-1  |
| C <sub>17</sub> H <sub>36</sub>                               | 2,6,10-trimethyltetradecane             | 14905-56-7  |
| C <sub>9</sub> H <sub>16</sub> BrNO                           | 2-Piperidinone                          | 195194-80-0 |
| C <sub>20</sub> H <sub>34</sub> O                             | 8,11,14-Eicosatrienoic acid             | 1783-84-2   |
| C <sub>37</sub> H <sub>76</sub> O                             | 1-Heptatriacotanol                      | 105794-58-9 |
| C <sub>16</sub> H <sub>26</sub> O <sub>3</sub>                | 2-Dodecen-1-yl(-)succinic anhydride     | 19780-11-1  |
| C <sub>16</sub> H <sub>30</sub> O                             | 11-Hexadecyn-1-ol                       | 65686-49-9  |
| C <sub>14</sub> H <sub>24</sub> O <sub>2</sub>                | 3-Tetradecanynoic acid                  | 55182-76-8  |
| C <sub>40</sub> H <sub>56</sub>                               | $\pi$ Carotene                          | 7235-40-7   |
| C <sub>15</sub> H <sub>28</sub> O                             | 2-Pentadecyn-1-ol                       | 2834-00-6   |
| C <sub>15</sub> H <sub>28</sub> O                             | Z,Z-2,5-Pentadecadien-1-ol              | 139185-79-8 |
| C <sub>15</sub> H <sub>24</sub> O                             | Butylated Hydroxytoluene                | 128-37-0    |
| C <sub>22</sub> H <sub>38</sub> O <sub>2</sub>                | Cyclopropaneoctanoic acid               | 10152-71-3  |
| C <sub>12</sub> H <sub>20</sub> O <sub>4</sub>                | trans-Traumatic acid                    | 6402-36-4   |
| C <sub>15</sub> H <sub>26</sub> O <sub>2</sub>                | Geranyl isovalerate                     | 109-20-6    |
| C <sub>16</sub> H <sub>34</sub> N <sub>2</sub> O              | 16-Hexadecanoyl hydrazide               | 2619-88-7   |
| C <sub>16</sub> H <sub>22</sub> O <sub>2</sub>                | 1,1'-Butadiynylenedicyclohexanol        | 5768-10-5   |
| C <sub>19</sub> H <sub>32</sub> O <sub>2</sub>                | 9-Octadecen-12-ynoic acid, methyl ester | 56847-05-3  |
| C <sub>18</sub> H <sub>38</sub> N <sub>2</sub> O              | Stearic acid hydrazide                  | 4130-54-5   |
| C <sub>16</sub> H <sub>30</sub> O                             | 7-Hexadecenal, (Z)-                     | 56797-40-1  |
| C <sub>10</sub> H <sub>16</sub> O <sub>2</sub>                | 2-Decanynoic acid                       | 1851-90-7   |
| C <sub>14</sub> H <sub>24</sub> O <sub>2</sub>                | 2-Myristynoic acid                      | 67587-19-3  |

**Table S5** Representative wastewater discharge standards of oil & gas industry in  
China

| Items<br>(mg·L <sup>-1</sup> , except<br>for dimensionless<br>pH) | Emission standard of pollutants for<br>petroleum chemistry industry<br>(GB31571-2015) |                                    | Emission standard of pollutants for<br>petroleum refining industry<br>(GB31571-2015) |                       |
|-------------------------------------------------------------------|---------------------------------------------------------------------------------------|------------------------------------|--------------------------------------------------------------------------------------|-----------------------|
|                                                                   | Direct<br>discharge <sup>a</sup>                                                      | Indirect<br>discharge <sup>b</sup> | Direct<br>discharge                                                                  | Indirect<br>discharge |
| pH                                                                | 6.0-9.0                                                                               | -                                  | 6-9                                                                                  | -                     |
| TSS                                                               | 70                                                                                    | -                                  | 70                                                                                   | -                     |
| COD <sub>cr</sub>                                                 | 60<br>100 <sup>c</sup>                                                                | -                                  | 60                                                                                   | -                     |
| BOD <sub>5</sub>                                                  | 20                                                                                    | -                                  | 20                                                                                   | -                     |
| NH <sub>3</sub> -H                                                | 8.0                                                                                   | -                                  | 8.0                                                                                  | -                     |
| TN                                                                | 40                                                                                    | -                                  | 40                                                                                   | -                     |
| TP                                                                | 1.0                                                                                   | -                                  | 1.0                                                                                  | -                     |
| TOC                                                               | 20<br>30 <sup>c</sup>                                                                 | -                                  | 20                                                                                   | -                     |
| Petroleum-like                                                    | 5.0                                                                                   | 20                                 | 5.0                                                                                  | 20                    |
| Sulfide                                                           | 1.0                                                                                   | 1.0                                | 1.0                                                                                  | 1.0                   |
| Fluoride                                                          | 10                                                                                    | 20                                 | -                                                                                    |                       |
| Volatile phenol                                                   | 0.5                                                                                   | 0.5                                | 0.3                                                                                  | 0.5                   |
| Cu                                                                | 0.5                                                                                   | 0.5                                | -                                                                                    | -                     |
| Total cyanide                                                     | 0.5                                                                                   | 0.5                                | 0.3                                                                                  | 0.5                   |

a. Direct discharge : wastewater discharged to municipal WWTPs or sewage pipe network.

b. Indirect discharge : wastewater discharged to private industrial WWTPs.

c. Wastewater from acrylonitrile- acrylic fibres, caprolactam, epichlorohydrin,  
2,6-di-tert-butyl-4-methylphenol, pure terephthalic acid, cresol, epoxide propane, and  
naphthalene production factories.

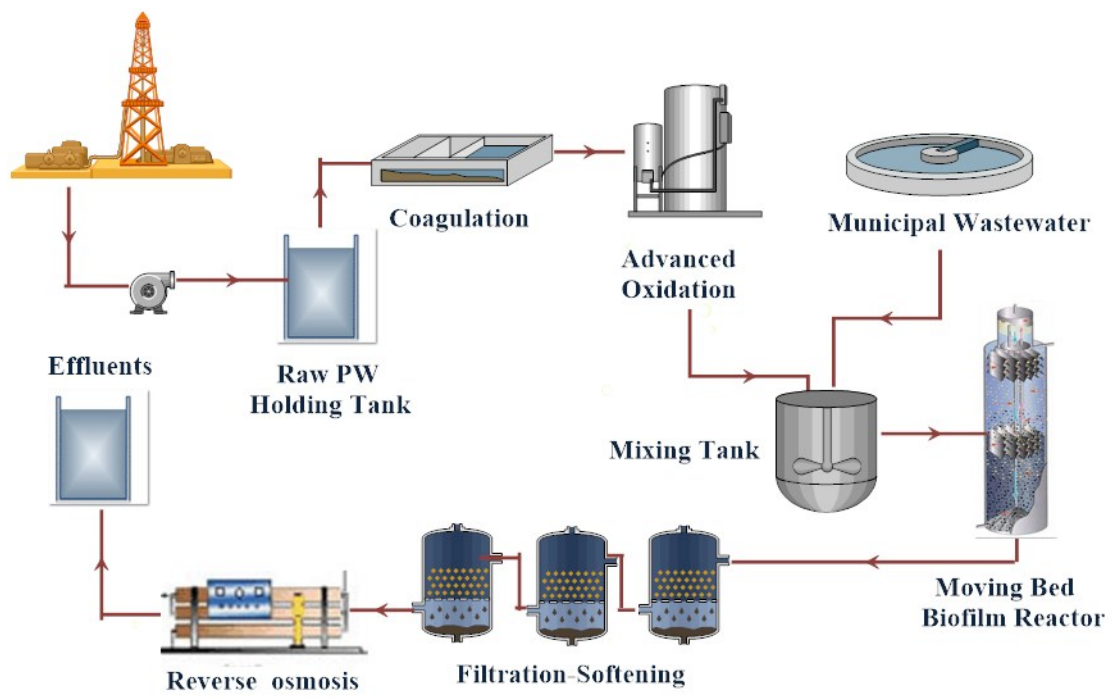

**Fig. S1** Flow diagram of the laboratory-scale co-treatment of PW and domestic wastewater.

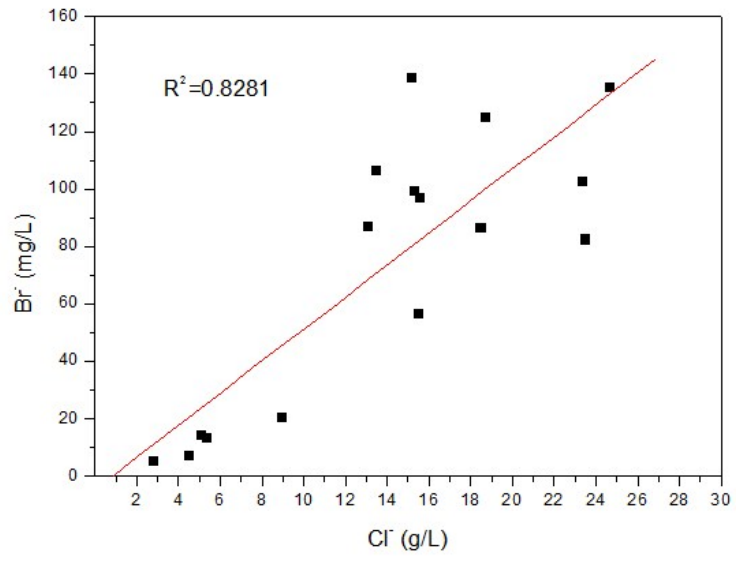

**Fig. S2** Relationship of Cl<sup>-</sup> and Br<sup>-</sup> among PW wells in the shale gas field in the Eastern Sichuan

Basin.



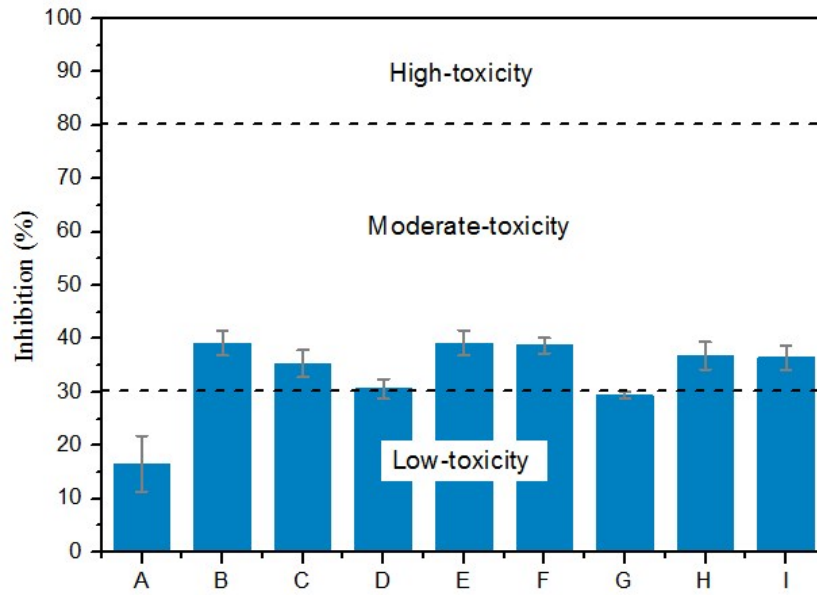

**Fig. S3** Acute toxicity tests of the raw PW samples among nine wells represented as the luminescence inhibition rate (low-toxicity level: inhibition ratio <30%; mid-toxicity level:  $\leq$ 30% inhibition ratio  $\leq$ 80%; high-toxicity level: inhibition ratio >80%).

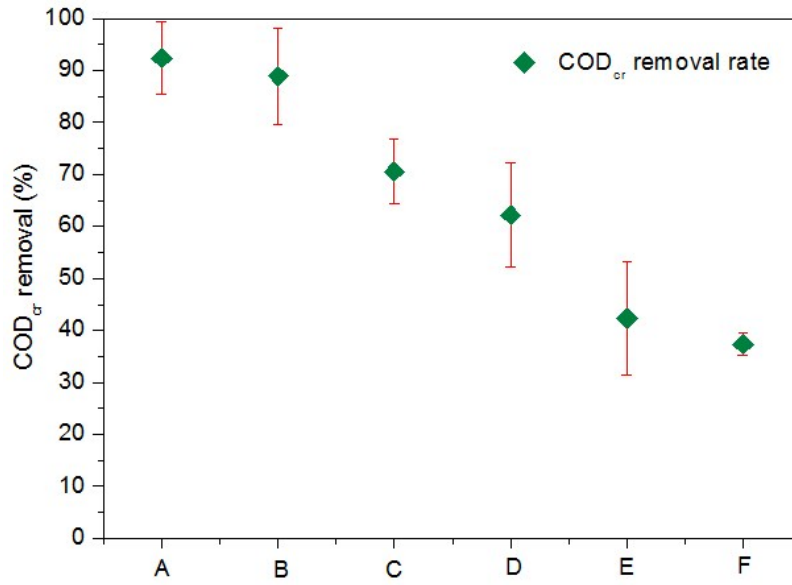

**Fig. S4** Comparison among different advanced and chemical oxidation processes on the removal of COD<sub>cr</sub> (A. Modified Fenton–NaClO oxidation; B. Activated potassium persulfate– NaClO oxidation; C. NaClO oxidation; D. Modified Fenton; E. Activated potassium persulfate; F. Fenton).

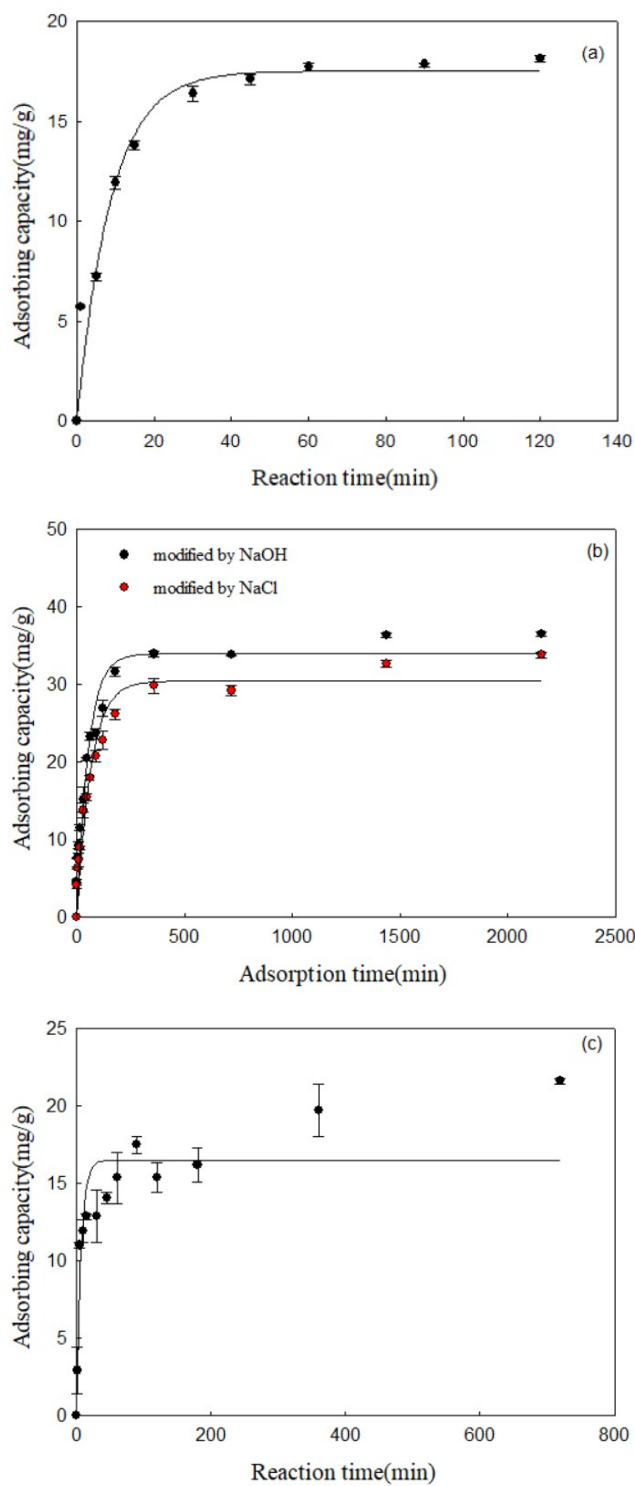

**Fig. S5** First-order kinetic fitting curve of a modified artificial zeolite for ammonia adsorption in deionized water (a. Raw artificial zeolite; b. NaOH- and NaCl-modified artificial zeolite; c. HCl-modified artificial zeolite).

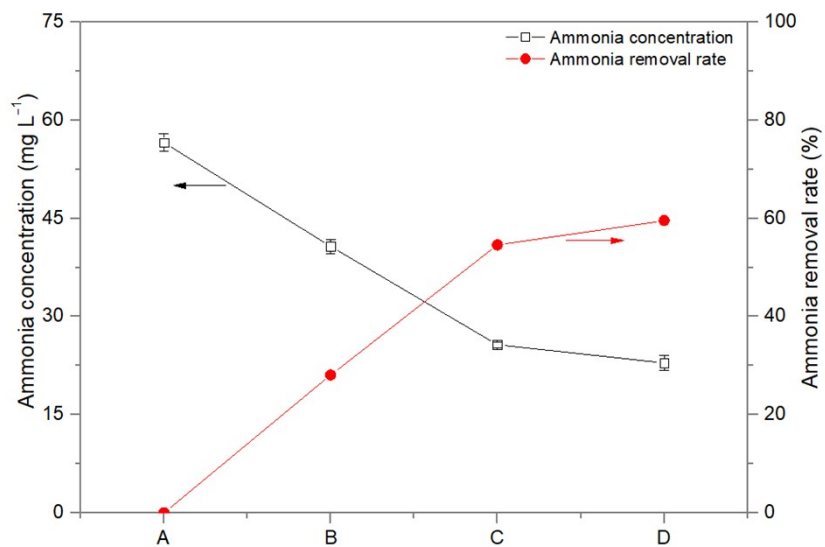

**Fig. S6** Ammonia removal rate of pretreated PW by a modified artificial zeolite (A: Sequential advanced oxidation pretreated PW; B. Filtration with a raw artificial zeolite; C. Filtration with a NaCl-modified artificial zeolite; D. Filtration with a NaOH-modified artificial zeolite).
